# Supplementary material
Source: PubMed Central journal article supplement (PMC5409521)
Supplement: NIHMS819143-supplement-Supp_Appendix_S1.pdf [file NIHMS819143-supplement-Supp_Appendix_S1.pdf]

1 **Appendix S1**

2

3 **Contents :**

4 **AedesBA Model Structure**

5 **Meteorological Data**

6 **Effects of Artificial Weather on Mosquito Population Dynamics**

7 **Buenos Aires Simulations**

8 *Buenos Aires – Calibration*

9 *Buenos Aires – Artificial weather results*

10 *Buenos Aires – Simulated control results*

11

12

13 **AedesBA Model Structure**

14

15

16

17

18

19

20

21

22

23

24

25

26

27

28

29

30

31

32

33

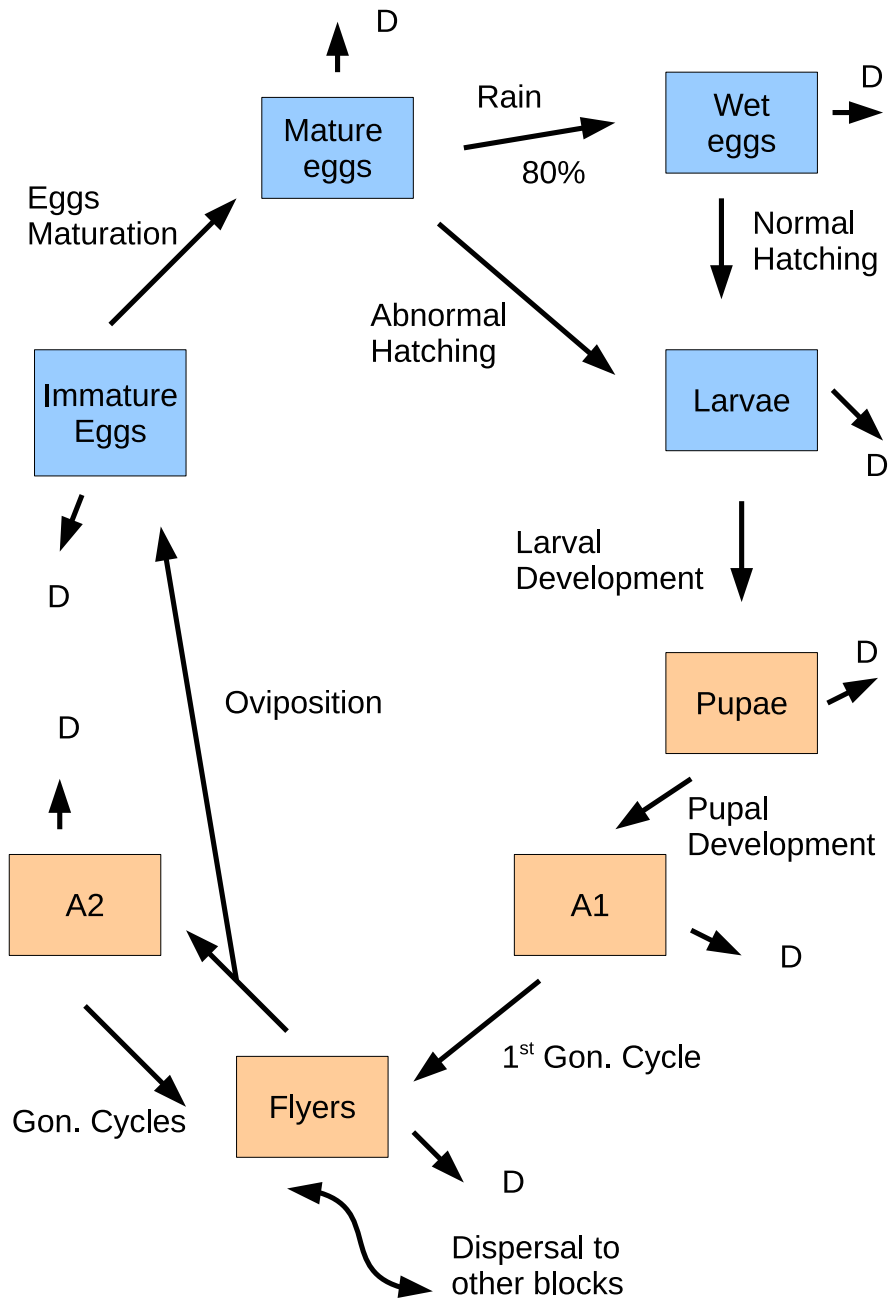

34 **Figure S1:** Life cycle of *Aedes aegypti* in the present version of the AedesBA model. Blue boxes

35 correspond to the part of the cycle modified for the present work.

36 **Meteorological Data**

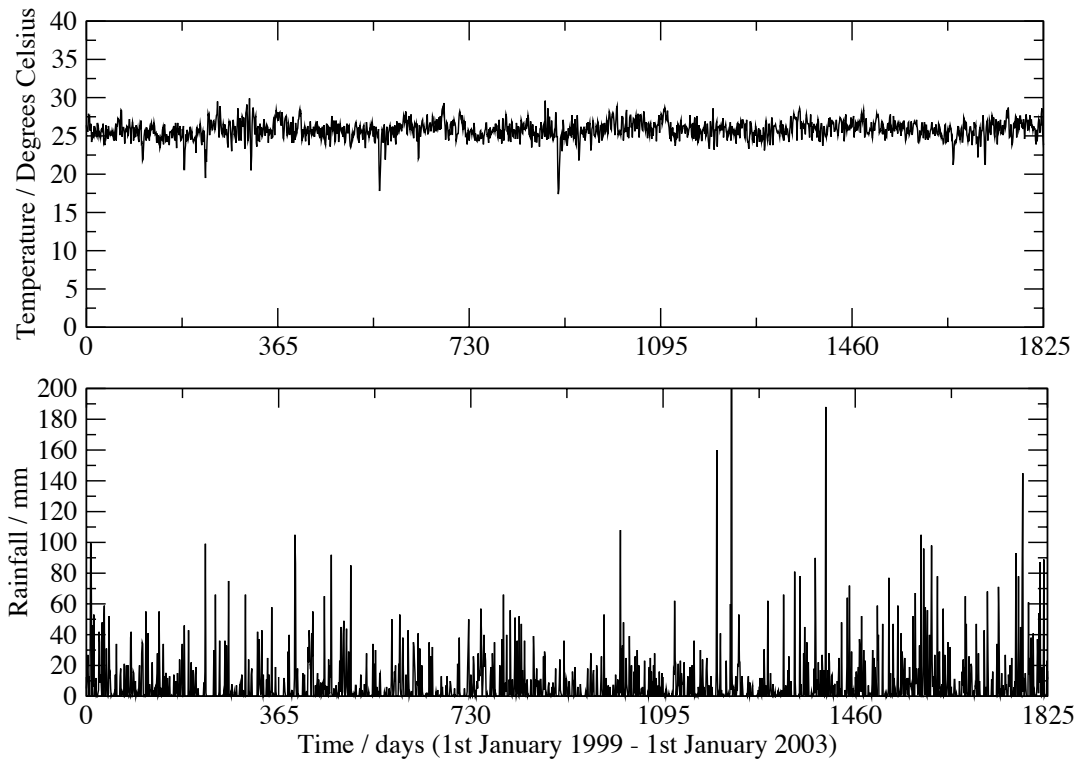

37

38 **Figure S2:** Mean temperature (top panel) and rainfall (bottom panel) of Iquitos (1<sup>st</sup> January 1999  
39 – 1<sup>st</sup> January 2003).

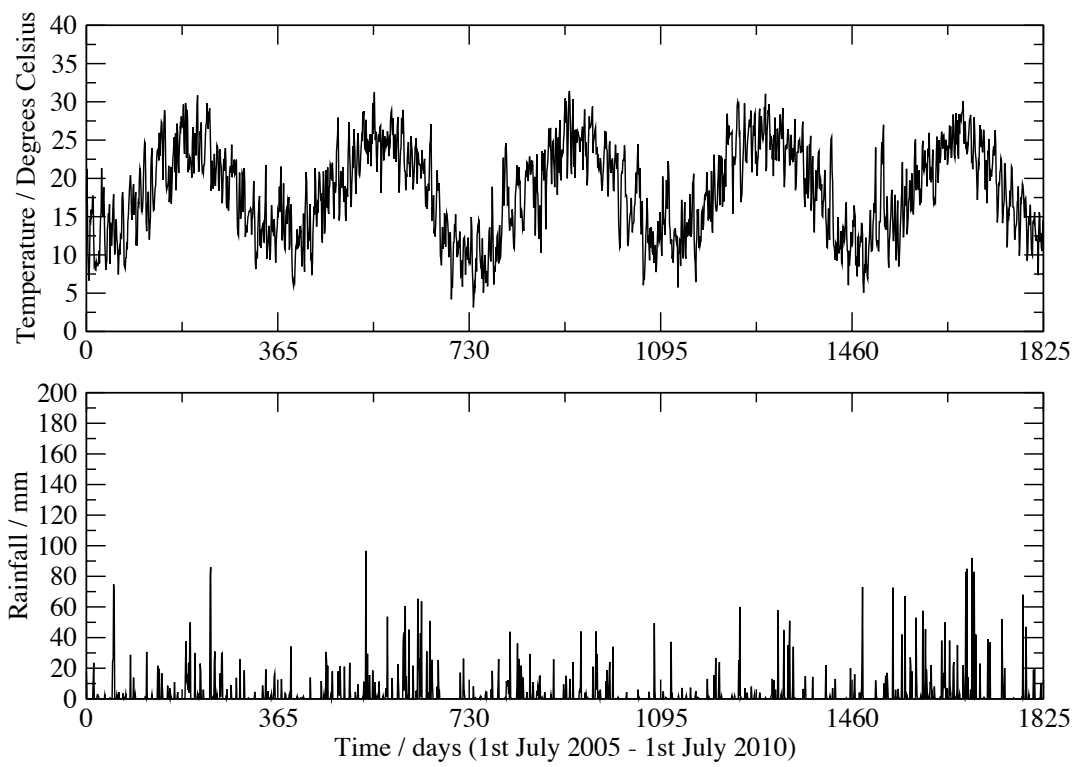

40

41 **Figure S3:** Mean temperature (top panel) and rainfall (bottom panel) of Buenos Aires (1<sup>st</sup> July  
42 2005 – 1<sup>st</sup> July 2010).

43

44 **Effects of Artificial Weather on Mosquito Population Dynamics**

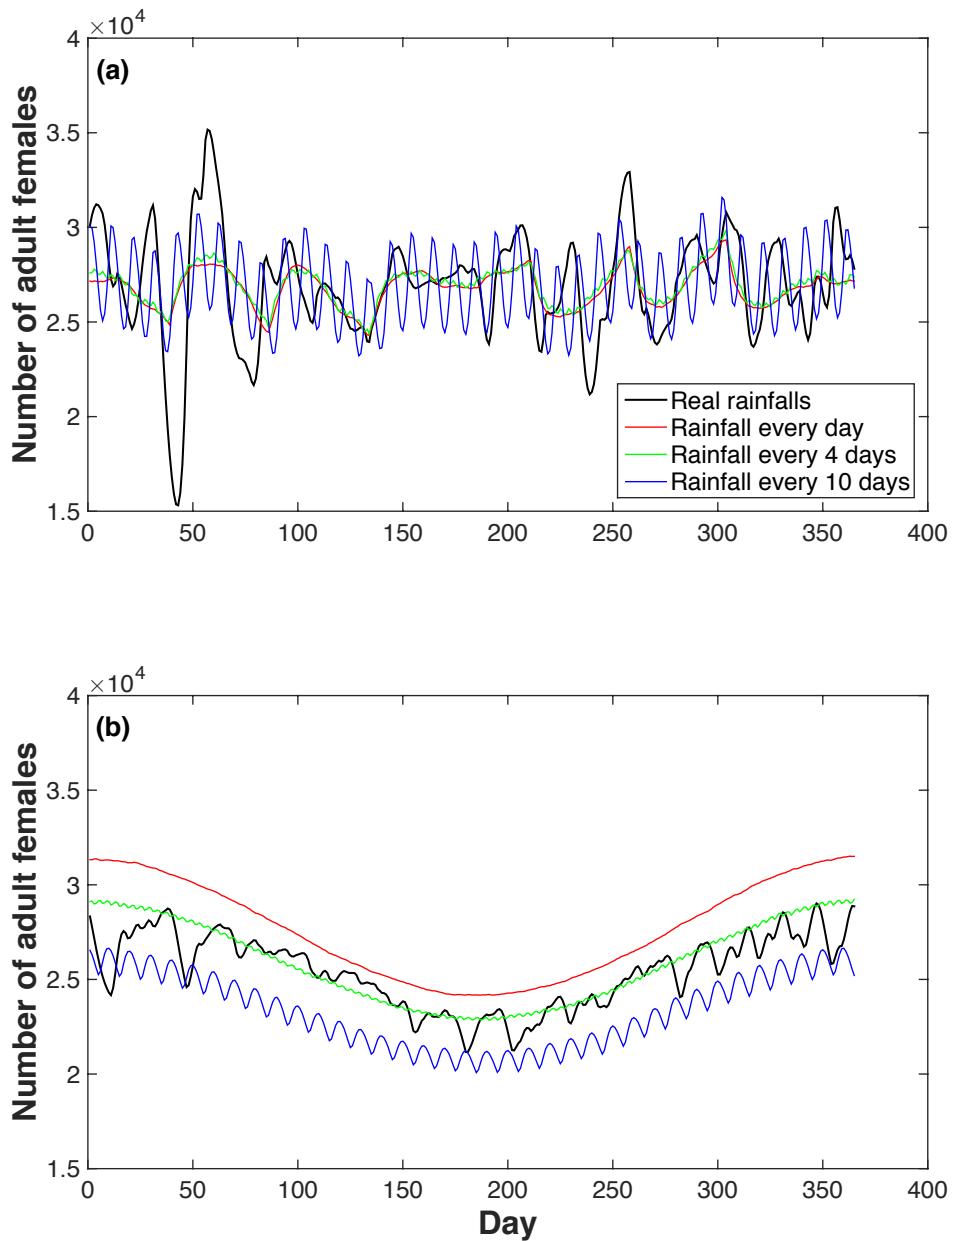

45

46 **Figure S4:** Effect of sinusoidally varying temperature on the adult female population, under  
47 various rainfall regimes: actual daily rainfall (black lines), rainfall every day (red lines), rainfall  
48 every 4 days (green lines) and rainfall every 10 days (blue lines). The amount of each rainfall is  
49 adjusted in the periodic regimes so that the annual total is the same across all 4 regimes. (a) Top  
50 panel: Skeeter Buster model. (b) Bottom panel: AedesBA model.

51 **Buenos Aires Simulations**

52

53 *Buenos Aires – Calibration*

54

55 Calibration in Buenos Aires was carried out like in Iquitos, with the exception of the addition of  
56 manually-filled containers to Skeeter Buster (see Methods section). Preliminary runs of Skeeter  
57 Buster with different proportions of manually-filled containers per block showed (Fig. S5, top  
58 panel) that the sensitivity of the number of adult females to this proportion varied across years.  
59 This sensitivity was lowest for the year 2009-2010, and so we used this period to carry out  
60 calibration of the two models. Calibration curves were then constructed for each model by  
61 varying food input per container (in Skeeter Buster) and number of breeding sites (in AedesBA)  
62 and calculating the number of adult females across the productive season (see Methods) (Figure  
63 S5, bottom panel and figure S6). Choosing to operate at similar average densities as in Iquitos,  
64 we obtained default values of  $4.2717 \text{ mg}\cdot\text{day}^{-1}$  per container in Skeeter Buster and 35 breeding  
65 sites per block in AedesBA. All subsequent simulations regarding Buenos Aires were carried out  
66 using these values.

67

68

69

70

71

72

73

74

75

76

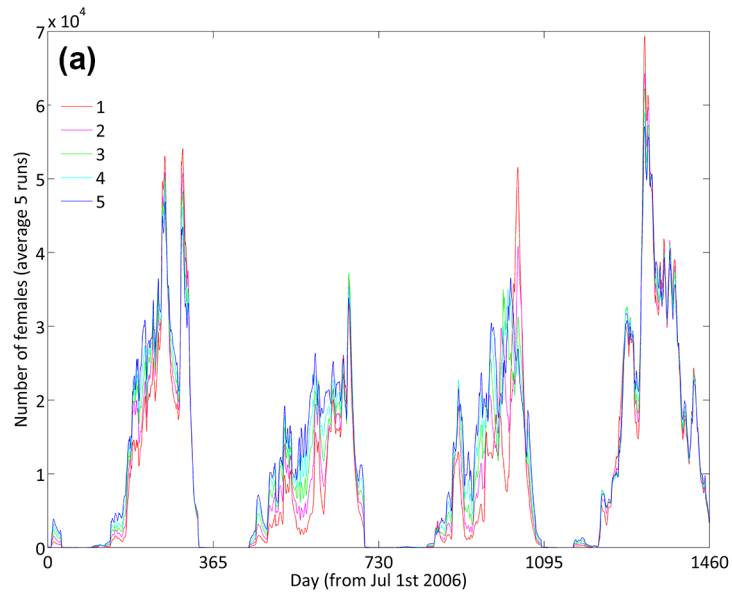

77

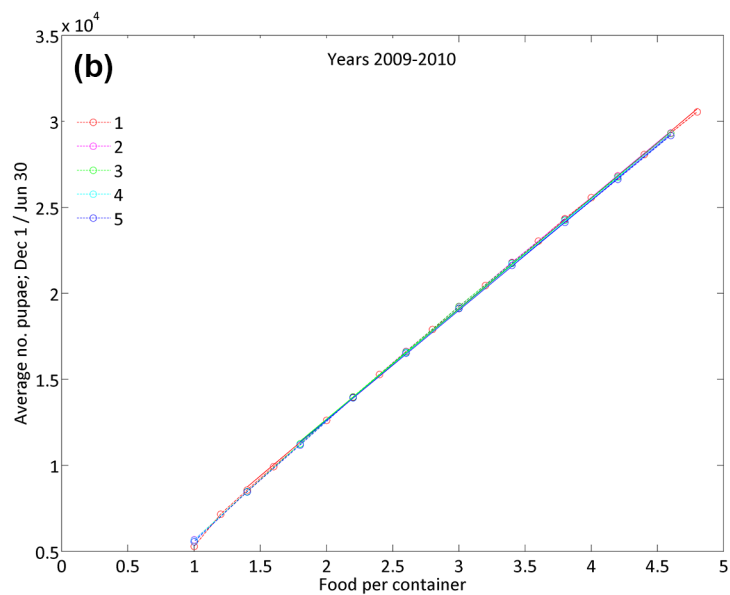

85

86 **Figure S5:** Skeeter Buster calibration in Buenos Aires. (a) Top panel: runs of Skeeter Buster

87 with different numbers of manually-filled containers per block, from 1 to 5 such containers

88 (shown in the legend). (b) Bottom panel: Calibration curves constructed by varying food input

89 per container, for different numbers of manually filled containers, calculated specifically in the

90 period 2009-2010.

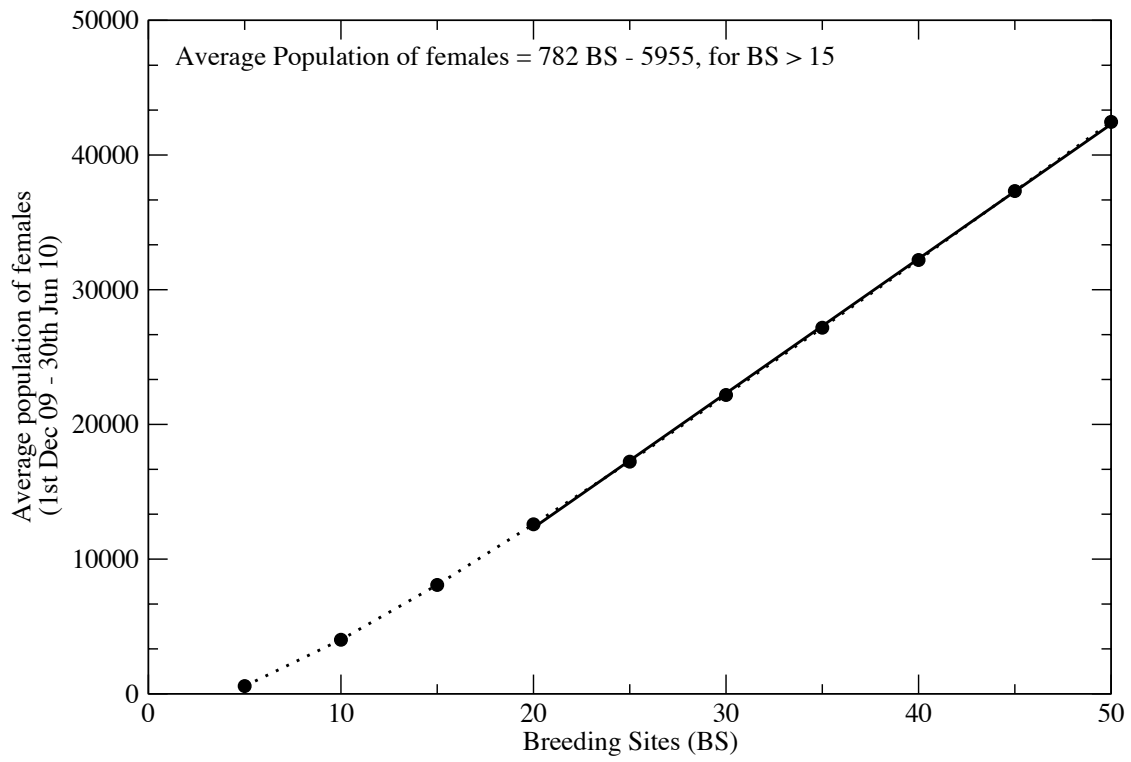

91

92 **Figure S6:** AedesBA calibration curve for Buenos Aires in the period 2009-2010.



93 *Buenos Aires – Artificial weather results*

94

95 Given that Buenos Aires has a highly seasonal climate, we felt that exploring artificial weather  
96 conditions would be a much less informative exercise than it was for the Iquitos setting.

97 Consequently we omit this exploration here.

98

99 *Buenos Aires – Simulated control results*

100

101 We studied the effect on the female adult population of three vector control interventions. These  
102 interventions consisted of the complete elimination of adults, larvae and both populations  
103 simultaneously for one week (days 175 – 181 of the second year of simulation, corresponding to  
104 the dates: 23<sup>rd</sup> to 29<sup>th</sup> December 2009). We ran the models with the real daily temperatures and  
105 real rainfalls of the city of Buenos Aires from 1<sup>st</sup> July 2008 to 30<sup>th</sup> June 2010. In the AedesBA  
106 model only normal hatching was considered (hatching triggered by rainfalls greater than 7.5 mm  
107 / day).

108 Figure S7 shows the time-course of the total female population in the 20x20-block grid  
109 for both populations without interventions and under the three different simulated interventions:  
110 adulticidal control ((a) and (b)), larvicidal control ((c) and (d)) and both controls simultaneously  
111 ((e) and (f)). As we previously observed in the control interventions simulated for Iquitos, the  
112 AedesBA model shows that adulticidal control is more efficient than larvicidal control. The  
113 recovery of the population after the intervention is slow to reach the non-intervention values by  
114 the end of the *Aedes aegypti* activity season. The use of the combined strategy of adulticidal and  
115 larvicidal control does not show any significant advantage compared to the adulticidal control. In

116

## AedesBA model

## Skeeter Buster model

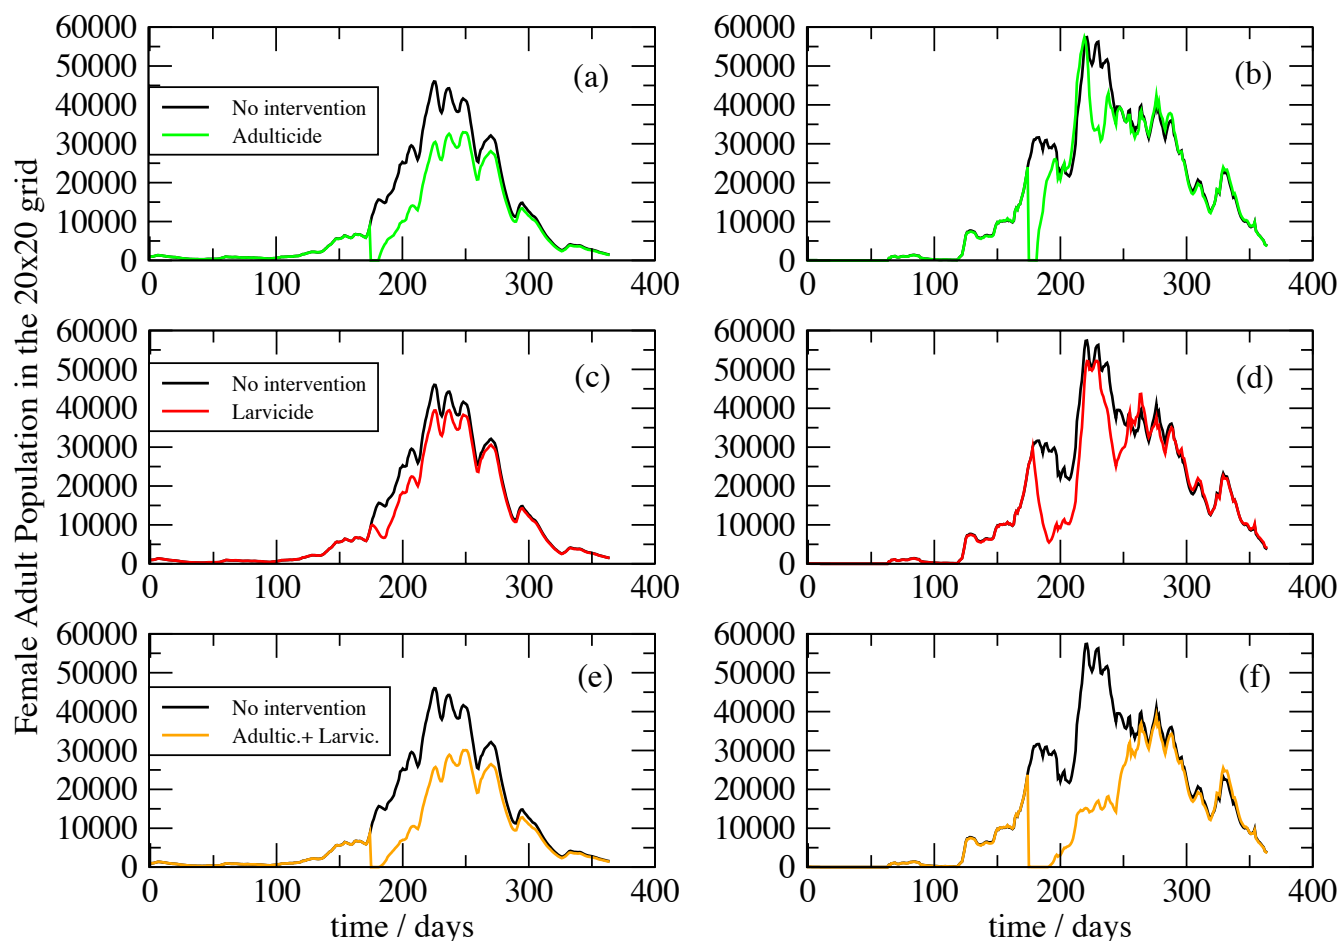

144

145 **Figure S7:** Effect of control strategies on the female adult population in Buenos Aires. Three  
 146 different strategies were simulated: use of adulticides (green line, first row: panels a and b), use  
 147 of larvicides (red line, second row: panels c and d) and use of adulticides and larvicides  
 148 simultaneously (orange line, third row: panels e and f). The control strategies were carried out  
 149 along one week (days 175-181, 23<sup>rd</sup> to 29<sup>th</sup> December) with 100 % efficiency. The time-course  
 150 of the total female population in the grid without intervention (black line) and under the  
 151 appropriate intervention is shown in each panel. AedesBA model (first column, panels a, c and  
 152 e) and Skeeter Buster model (second column, panels b, d and f). All results shown are averages  
 153 over 20 simulation runs.

154

155 contrast, for the Skeeter Buster model we observe that the combined strategy of adulticidal and  
156 larvicidal control seems to be the most efficient of the three strategies simulated.

157 In order to study the effect of adult dispersal in the recovery of the populations we again  
158 simulated interventions in only a small part of the 20x20-block grid, treating a square area of 100  
159 blocks in the center of the 20x20 grid. The three control strategies, use of adulticides, larvicides  
160 and both simultaneously, were carried out for one week (days 175 – 181 of the second year of  
161 simulation, corresponding to the dates: 23<sup>rd</sup> to 29<sup>th</sup> December 2009). The time-courses of the  
162 female adult population densities (population per block under control) for both models without  
163 interventions and for the three control strategies in the 20x20 grid and in the 10x10 grid are  
164 shown in Figure S8. As we observed for Iquitos, population recovery in the AedesBA model is  
165 slightly faster in the case of control in the 10x10 grid compared to when control is applied to the  
166 entire arena. Again, this is also the case for the Skeeter Buster model when either adulticidal or  
167 larvicidal control was performed; furthermore, in the case of simultaneous adulticidal and  
168 larvicidal control a bigger difference is observed between the outcomes when intervention occurs  
169 in the entire arena or in its central section.

170 As for the Iquitos model, we illustrate spatiotemporal dynamics of the population by  
171 depicting the behavior seen along a transect taken through the grid. Figure S9 shows the female  
172 adult population along a 20 block transect over time. The first row (panels a, b and c)  
173 corresponds to adulticidal, larvicidal and combined controls for the AedesBA model, and the  
174 second row (panels d, e and f) corresponds to adulticidal control, larvicidal control and both  
175 controls for the Skeeter Buster model.

176

177

178

179

180

181

182

183

184

185

186

187

188

189

190

191

192

193

194

195

196

197

198

199

200

201

202

203

204

205

206

207

208

209

210

211

212

213

### AedesBA model

### Skeeter Buster model

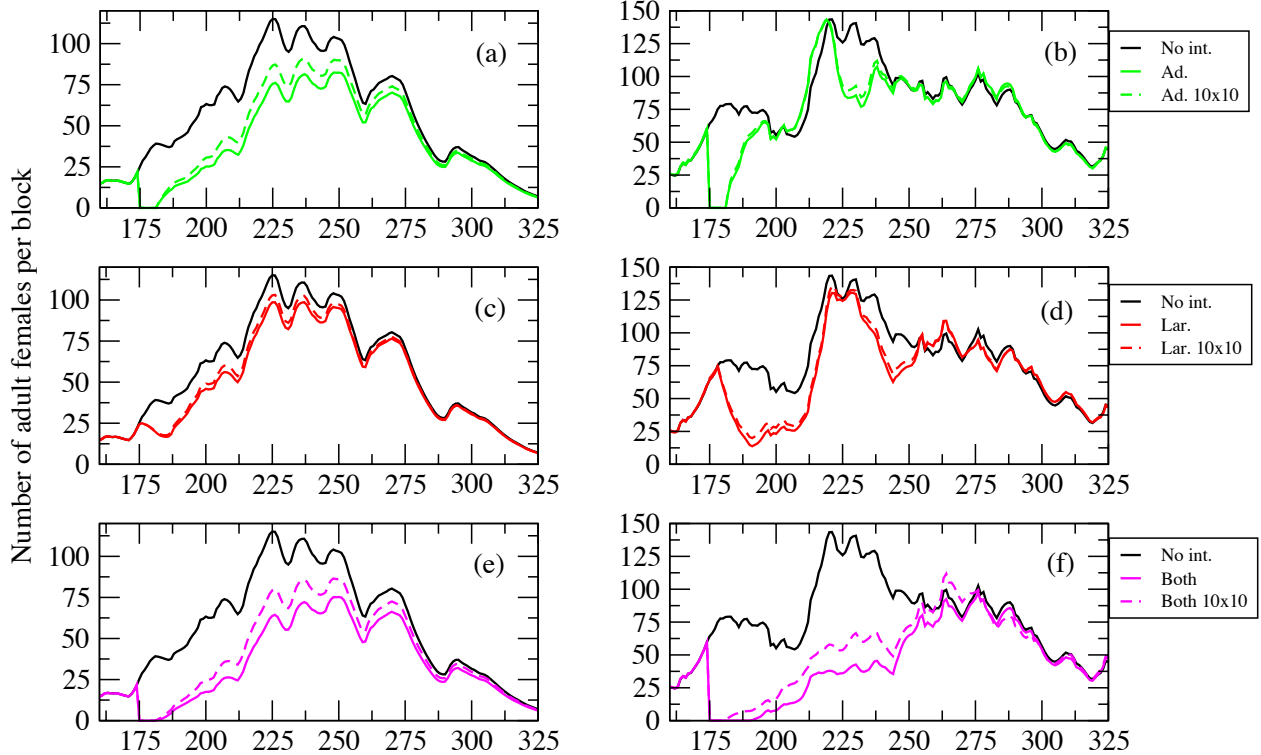

**Figure S8:** Effect of different control strategies on the female adult population when the control was performed in the whole area (20x20 blocks grid) and in a smaller area of 10x10 blocks in the center of the 20x20 grid. First column (panels a, c and e) show results of the AedesBA model and second column (panels b, d and f) show results of the Skeeter Buster model. Different rows depict different interventions: first row (panels a and b) adulticide, second row (panels c and d) larvicide, third row (panels e and f) adulticide and larvicide simultaneously. The time-course of the female adult population density (population per block under control) is shown in each panel: Population without intervention (black line), population under the three control strategies in the whole grid (use of adulticides (green solid line), larvicides (red solid line), both simultaneously (magenta solid line), and the same three strategies in the 10x10 grid (colored dashed lines). All strategies were carried out along one week (days 175-181, 23<sup>rd</sup> to 29<sup>th</sup> December) with 100 % efficiency. All results shown are averages over 20 simulation runs.

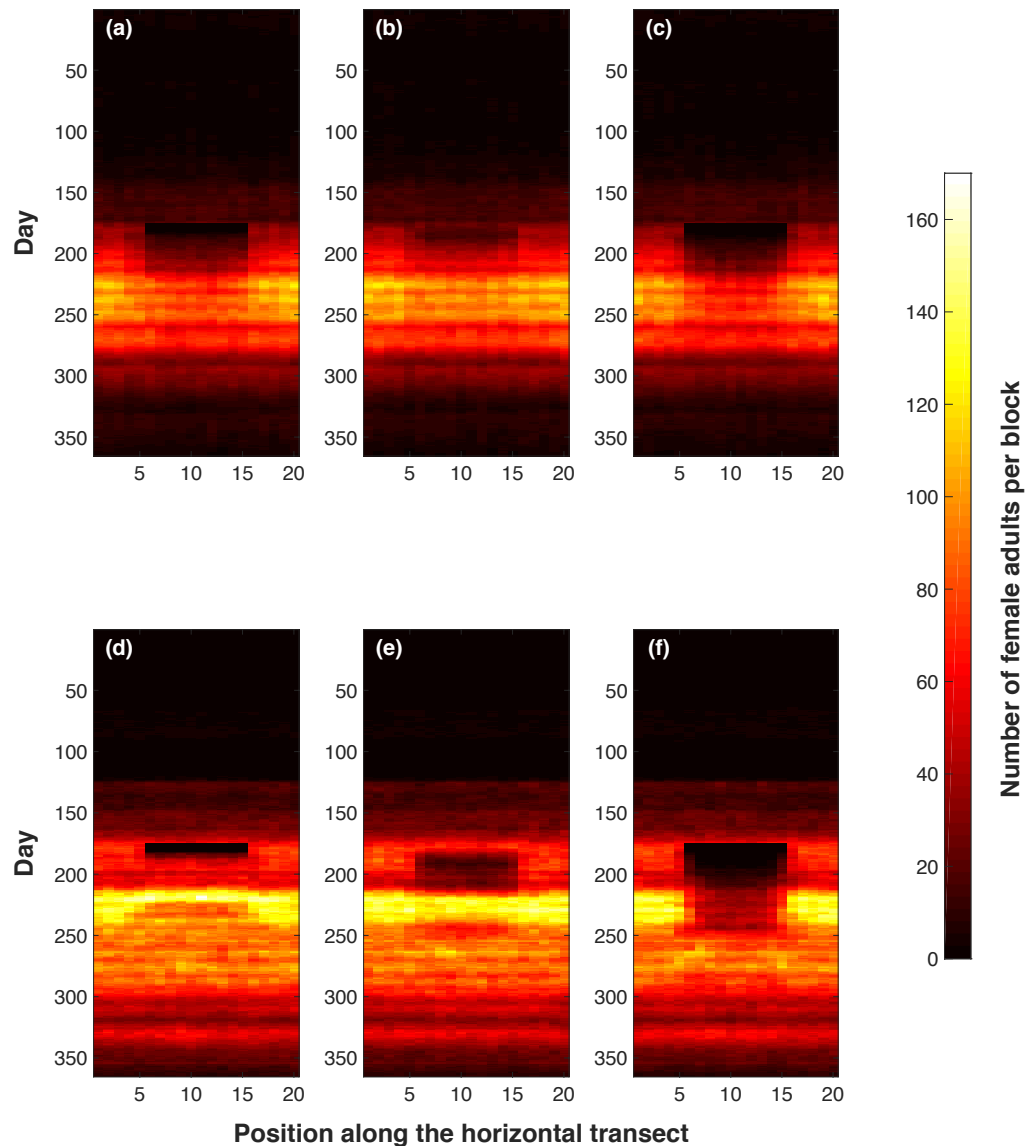

214

215

216 **Figure S9:** Evolution of the female adult population (in the Buenos Aires setting) along a 20-  
 217 block transect taken through the center of the grid under various control interventions. The x-  
 218 axis corresponds to the block position along the 20-block transect, the y-axis corresponds to time.  
 219 The color corresponds to the number of female adults in a given block according to the color bar  
 220 on the right. First row (panels a, b and c): AedesBA model. Second row (panels d, e and f):  
 221 Skeeter Buster model. First column (panels a and d): use of adulticide. Second column (panels b  
 222 and e): use of larvicide. Third column (panels c and f): simultaneous use of adulticide and  
 223 larvicide. Each control strategy was simulated with 100% efficiency during days 175 through  
 224 181 in a 10x10 grid in the center of the 20x20 simulation arena. Results shown are averages over  
 225 5 simulation runs.

226  
227  
228  
229  
230  
231  
232  
233  
234  
235  
236  
237  
238  
239  
240  
241  
242  
243  
244  
245  
246  
247  
248  
249

Finally, as for Iquitos, we studied another control intervention that consisted of a comprehensive control where individuals of all stages (eggs, larvae, pupae and adults) were removed from the target area. Here we employed a square grid of 45x45 blocks and the target area consisted of the 900 blocks (i.e. 30x30 blocks) in the center of the grid. Because of the complete removal of the local population, the recovery process is strongly influenced by mosquito dispersal into the central area, i.e. involves recolonization. Figure S10 shows the effect of the total elimination of individuals of all mosquito stages on the evolution of the female adult population in Buenos Aires. Similar time courses of the female adult population density are observed for both models. Spatiotemporal dynamics are illustrated in Figure S11, which shows the evolution of the female adult population along a 45 block transect across the grid. We observe a D-shape recovery after intervention in agreement with a recolonization process due to adult dispersal.

250

251

## AedesBA model

## Skeeter Buster model

252

253

254

255

256

257

258

259

260

261

262

263

264

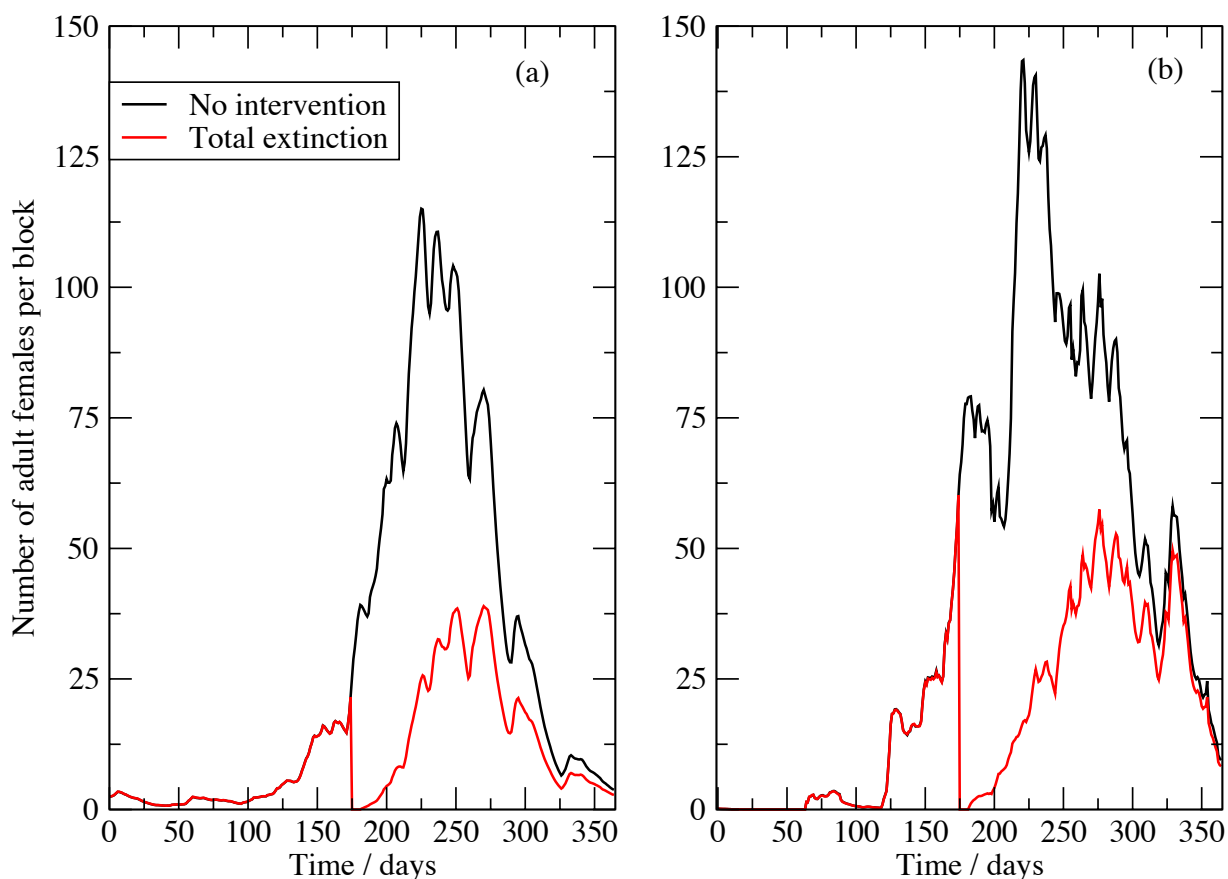

265

**Figure S10:** Effect of the total elimination of individuals of all mosquito stages on the evolution

266

of the female adult population in Buenos Aires. The control strategy was simulated with 100 %

267

efficiency in a 30x30 grid in the center of a 45x45 grid along one week (days 175 through 181 of

268

the second year of simulation, 23<sup>rd</sup> to 29<sup>th</sup> December). The time course of the female adult

269

population density (number of adult females per block) is shown in each panel: population

270

without intervention (black line) and control strategy (red line). All results shown are averages

271

over 20 simulation runs.

272

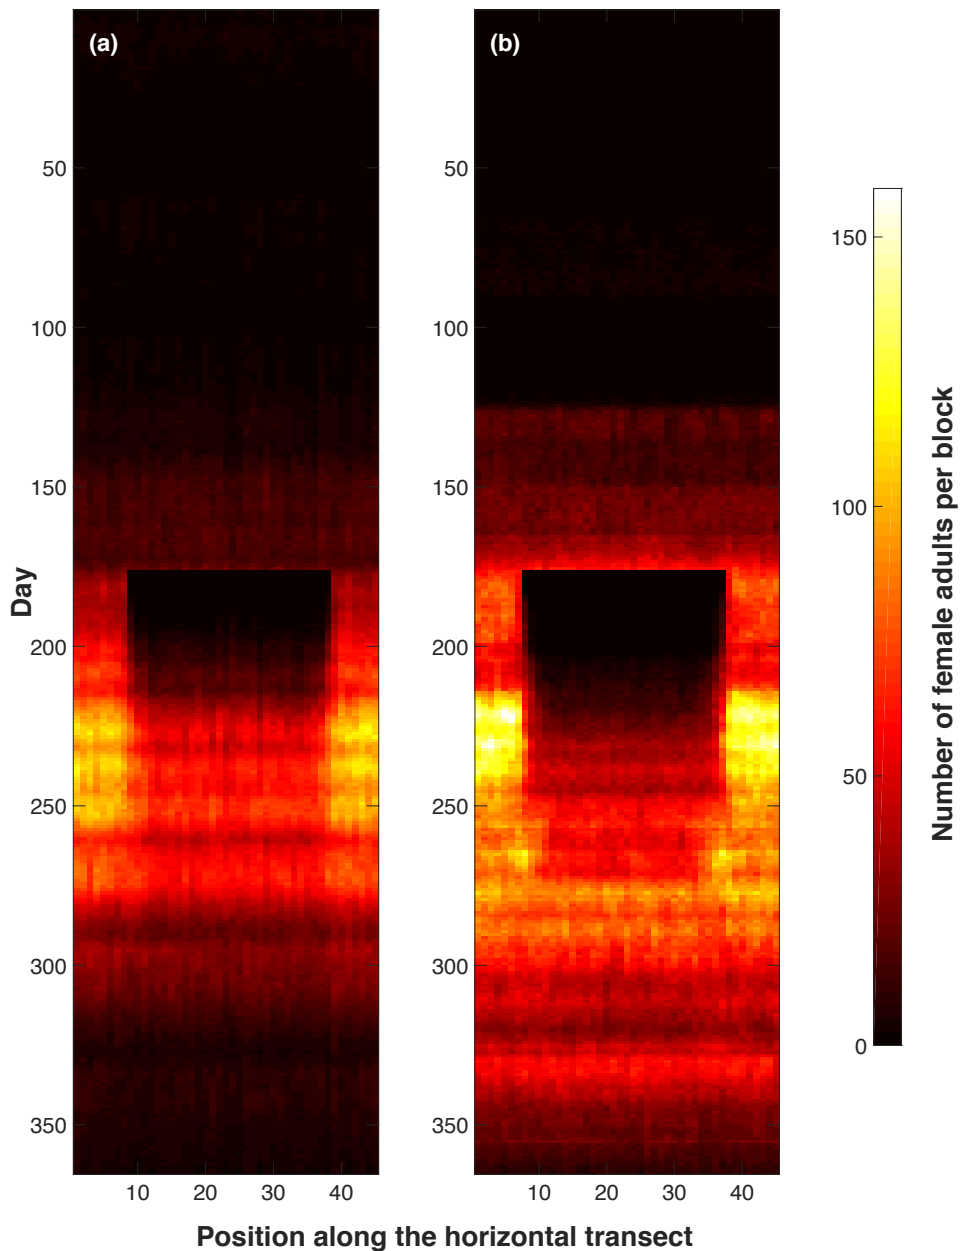

273

274 **Figure S11:** Evolution of the female adult population (in the Buenos Aires setting) along a 45  
 275 block transect taken through the center of the grid, with targeted elimination of all mosquito  
 276 stages in the central area. The horizontal axis corresponds to the block position along the 45-  
 277 block transect, the vertical axis corresponds to time. The color corresponds to the number of  
 278 female adults in a given block according to the color bar on the right. Panel (a): AedesBA model.  
 279 Panel (b): Skeeter Buster model. Control was simulated during days 175 through 181 in a 30x30  
 280 grid in the center of the 45x45 simulation arena, and was assumed to eliminate all mosquito  
 281 stages (eggs, larvae, pupae and adults of both sexes) with 100% efficiency in each targeted block.  
 282 All results shown are averages over 5 simulation runs.
